# Supplementary material
Source: PubMed Central journal article supplement (PMC4764075)

## SUPPLEMENTARY INFORMATION

### Antibodies

The listed antibodies were used in the following applications.

| Antibody               | Catalogue number | Company                   | Applications         |
|------------------------|------------------|---------------------------|----------------------|
| CK14                   | PRB-155P         | Covance                   | IF                   |
| CK8                    | Troma-I          | DSHB                      | IF                   |
| Pan-Cytokeratin        | ab6401           | abcam                     | IF                   |
| GFP                    | RL600-101-215    | Rockland                  | IF                   |
| GFP                    | A11122           | Invitrogen                | WB                   |
| Slug                   | 9585             | Cell Signaling Technology | IF, WB, ChIP         |
| Snail                  | ab85931          | abcam                     | ChIP                 |
| Snail                  | 3895             | Cell Signaling Technology | IF (tissue sections) |
| Snail                  | 4719             | Cell Signaling Technology | IF (cultured cells)  |
| Snail                  | 3879             | Cell Signaling Technology | WB                   |
| EpCAM                  | 17-5791-82       | Ebioscience               | FC and FACS          |
| EpCAM                  | 12-5791-82       | Ebioscience               | FC and FACS          |
| E-Cad                  | 3195             | Cell Signaling Technology | IF and WB            |
| E-Cad                  | 610181           | BD Biosciences            | IF and WB            |
| Zeb1                   | Sc-25388         | Santa Cruz                | IF and WB            |
| N-Cad                  | 610920           | BD Biosciences            | WB                   |
| Vim                    | 5741             | Cell Signaling Technology | WB                   |
| Fsp1                   | A5114            | Dako                      | WB                   |
| $\beta$ -tubulin       | 2128             | Cell Signaling Technology | WB                   |
| $\beta$ -actin         | 4970             | Cell Signaling Technology | WB                   |
| CD49f                  | 313617           | Biolegend                 | FC and FACS          |
| CD24                   | 17-0242-80       | Ebioscience               | FC and FACS          |
| CD45                   | 13-04            | Ebioscience               | FC and FACS          |
| CD31                   | 13-0311          | Ebioscience               | FC and FACS          |
| Ter119                 | 13-5921          | Ebioscience               | FC and FACS          |
| Streptavidin eFluor450 | 48-4317-82       | Ebioscience               | FC and FACS          |

### qPCR primers

The following primers were used in quantitative PCR for measuring gene expression relative to  $\beta$ -actin.

| Gene       | Forward                | Reverse                 |
|------------|------------------------|-------------------------|
| b-actin    | CCACTGCCGCATCCTCTTCCT  | CACACAGAGTACTTGCGCTCAGG |
| E-cadherin | GTATCGGATTTGGAGGGACAC  | ATGATATGAGGCTGTGGGTTT   |
| N-cadherin | TGACATAGACCCAAACGCC    | GACAACTTTTACACGCAGG     |
| Vim        | CTGCACGATGAAGAGATCCAG  | ACTCGTTTGACTCCTGCTTG    |
| FN         | CTTTGGCAGTGGTCATTTTCAG | ATTCTCCCTTTCCATTCCCG    |
| Slug       | CTCACCTCGGGAGCATAACAG  | GACTTACACGCCCCAAGGATG   |
| Snail      | CACACGCTGCCTTGTGTCT    | GGTCAGCAAAGCACGGTT      |
| Zeb1       | GTTCTGCCAACAGTTGGTTT   | GCTCAAGACTGTAGTTGATG    |
| Twist      | CTGCCCTCGGACAAGCTGAG   | CTAGTGGGACGCGGACATGG    |

Supplementary Figure - Uncropped scans with size marker indications

Ext Data Fig. 5c

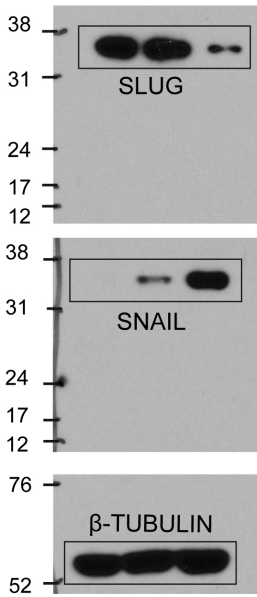

Ext Data Fig. 6h

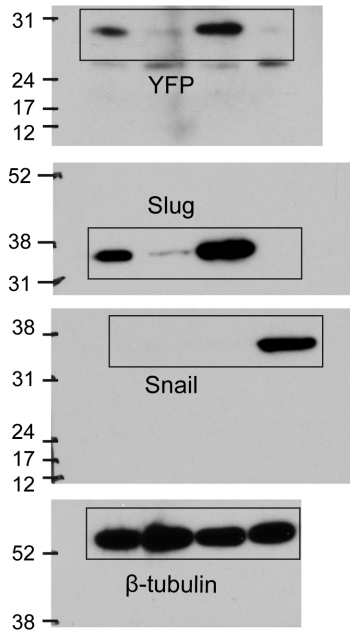

Ext Data Fig. 6f

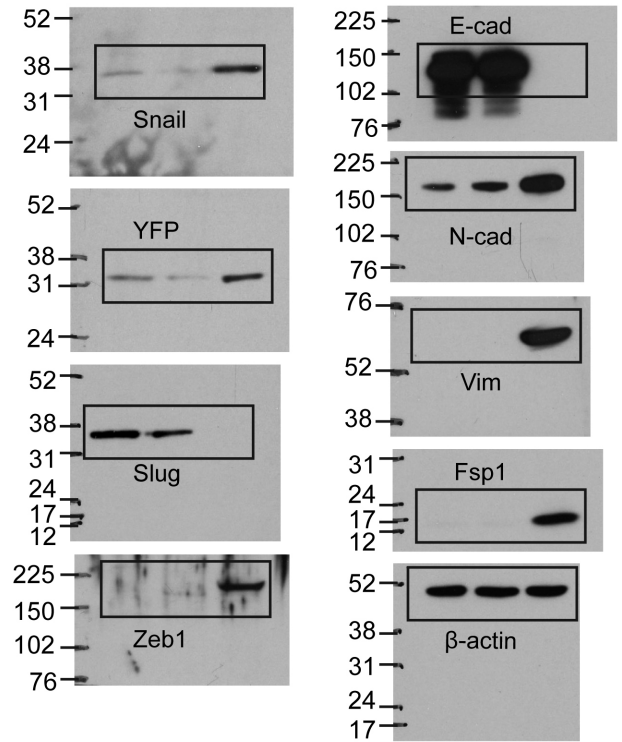

Ext Data Fig. 9b

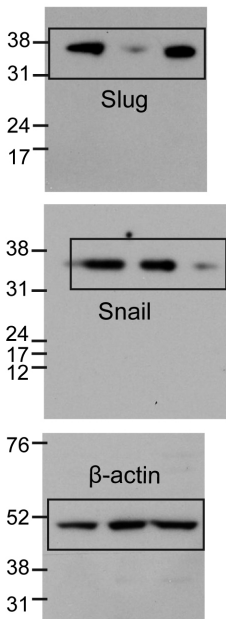

Ext Data Fig. 9c

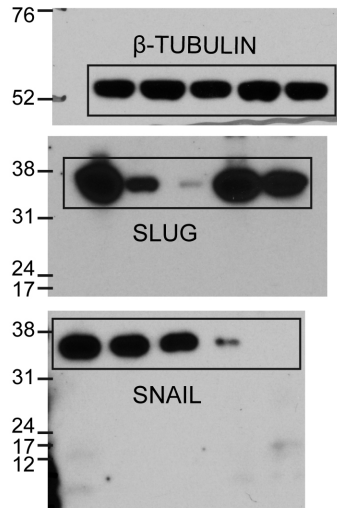

Ext Data Fig. 10a

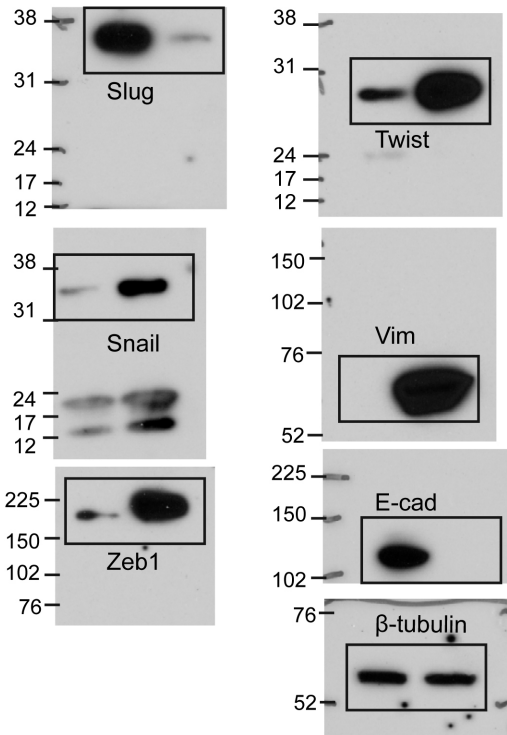

Supplement: NIHMS707170-supplement-Suppl_data.pdf [file NIHMS707170-supplement-Suppl_data.pdf]
